# Supplementary material for: High natural gene expression variation in the reef-building coral Acropora millepora: potential for acclimative and adaptive plasticity
Source: PubMed Central journal article supplement (PMC3630057; doi:10.1186/1471-2164-14-228), 2013-04-08

L NTC 1 2 3 4 5 6 7 8 9 10 11 12 13 14 15 16 17 18

L 19 20 21 22 23 24 25

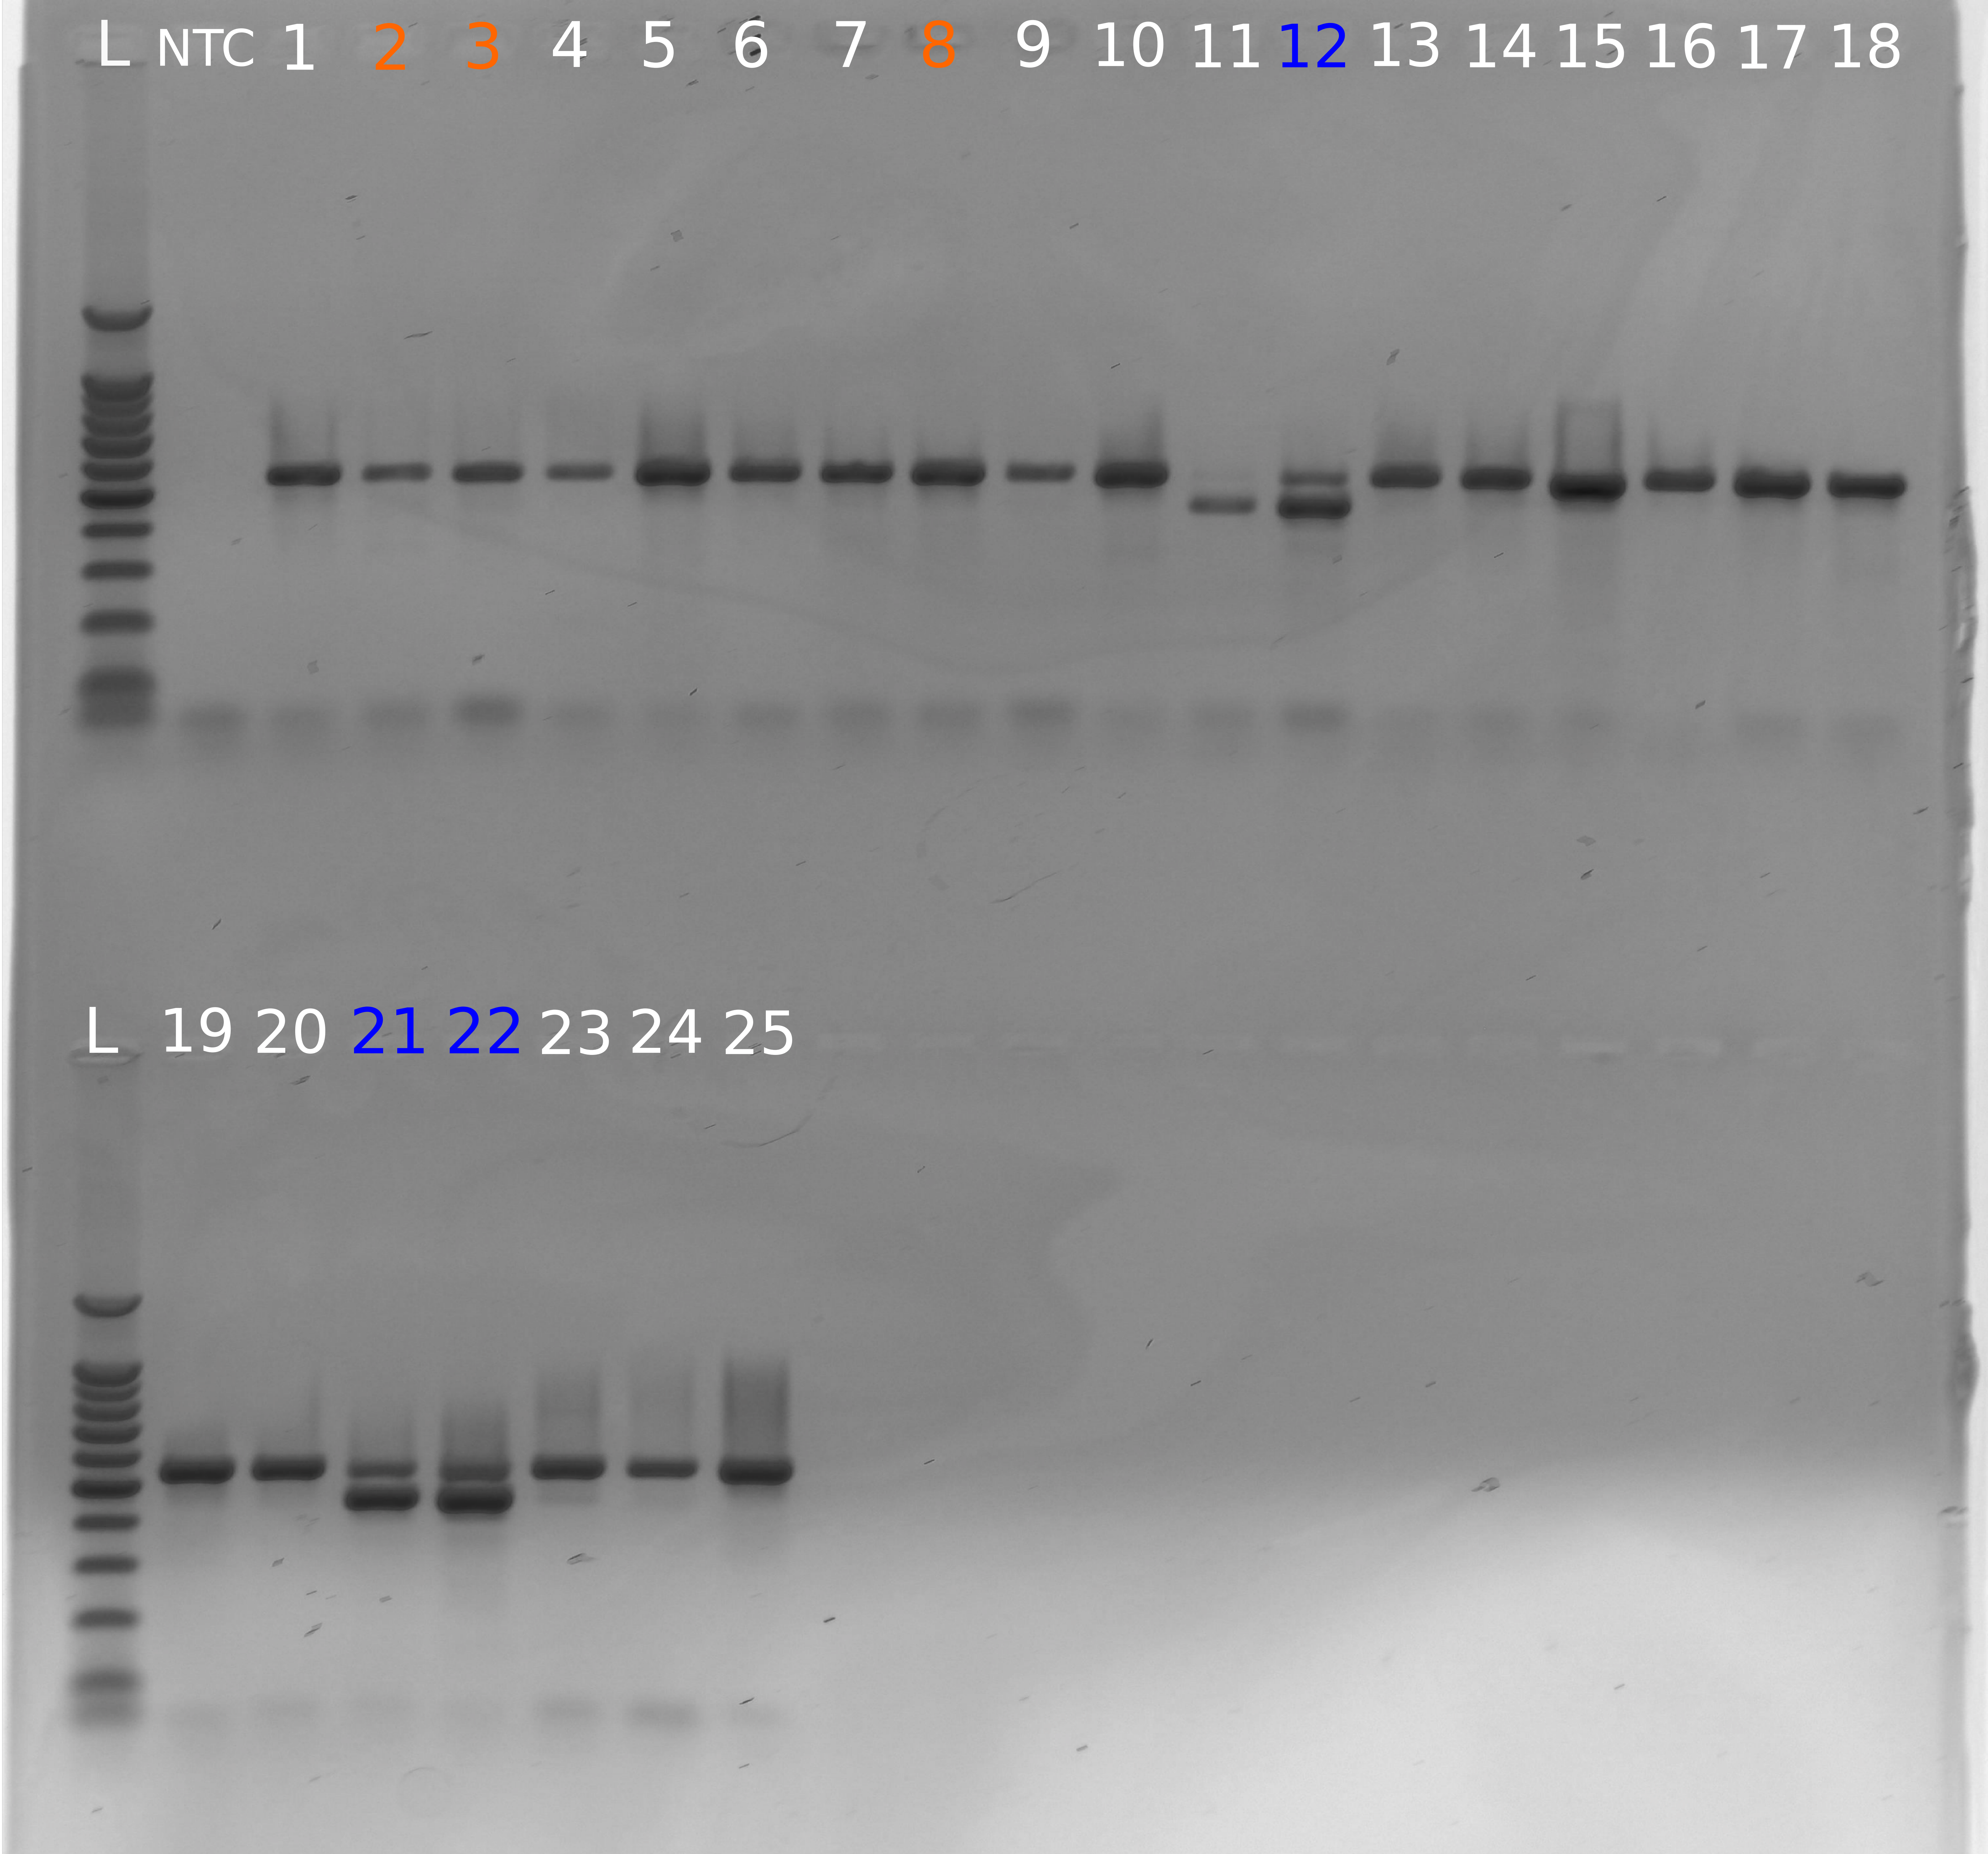

Supplement: 1471-2164-14-228-S1.pdf [file 1471-2164-14-228-S1.pdf]
